# Supplementary material for: Insights into aluminum-tolerance pathways in Stylosanthes as revealed by RNA-Seq analysis
Source: PubMed Central journal article supplement (PMC5904178; doi:10.1038/s41598-018-24536-3), 2018-04-17
Supplement: 41598_2018_24536_MOESM1_ESM.pdf [file 41598_2018_24536_MOESM1_ESM.pdf]

## **Supplementary Information:**

**Insights into aluminum-tolerance pathways in *Stylosanthes* as revealed by RNA-Seq analysis**

## **Authors:**

Caode Jiang<sup>1</sup>, Lusheng Liu<sup>1</sup>, Xiaofeng Li<sup>2</sup>, Rongrong Han<sup>1</sup>, Yunmin Wei<sup>1</sup> & Yongxiong Yu<sup>1,\*</sup>

## **Author affiliations:**

<sup>1</sup>Forage Laboratory, College of Animal Science and Technology, Southwest University, Chongqing, 400715, China

<sup>2</sup>College of Agriculture, Guangxi University, Nanning, 530005, China

## **Authors for correspondence:**

Caode Jiang (jcdpjax@swu.edu.cn), Yongxiong Yu (email: yuyongxiong8@126.com)

# 1. Supplementary Figures

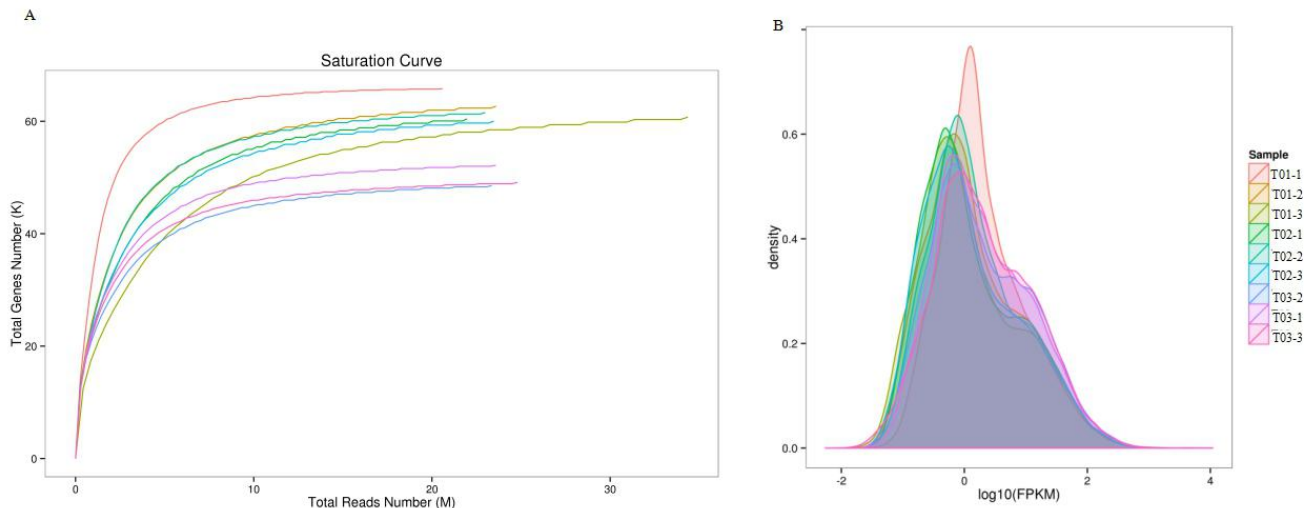

Fig. S1 Saturation simulation diagram of transcriptomic data (A) and comparison chart of density distribution of FPKM for each sample (B).

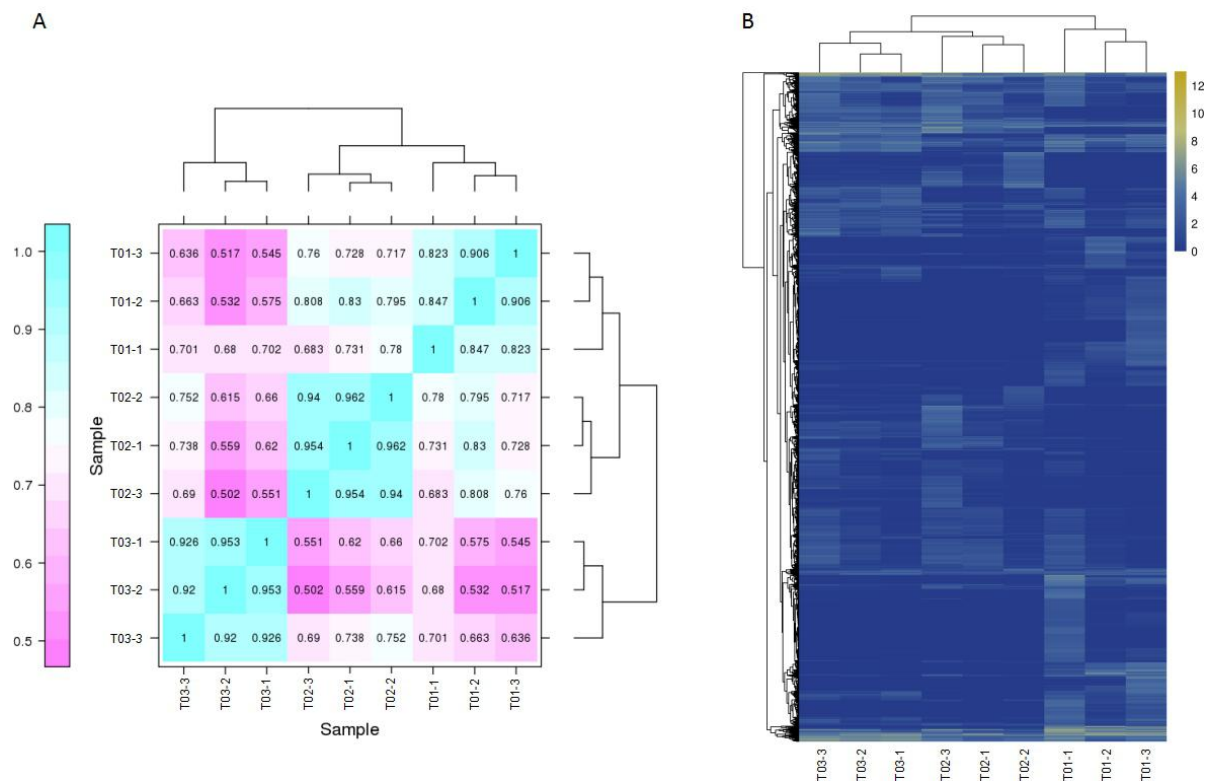

Fig. S2 Correction of all gene expression based on determination coefficients ( $R^2$ ) (A) and cluster of differentially expressed genes between the 9 samples (B). Gene expression values are log10 transformed.

A: T01\_vs\_T02

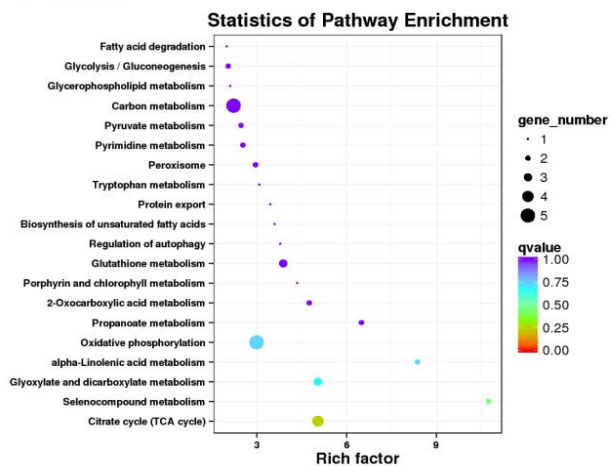

B: T02\_vs\_T03

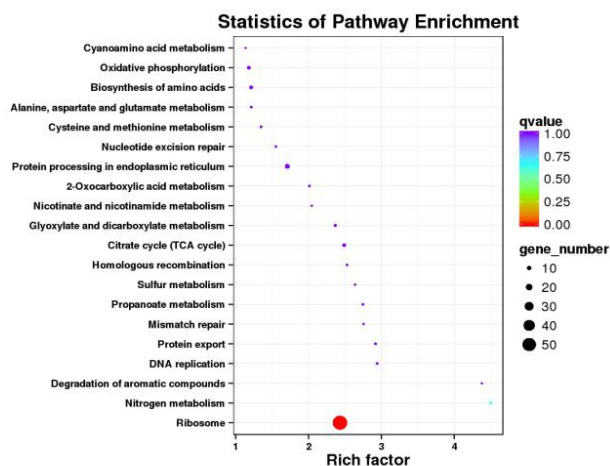

C: T01\_vs\_T03

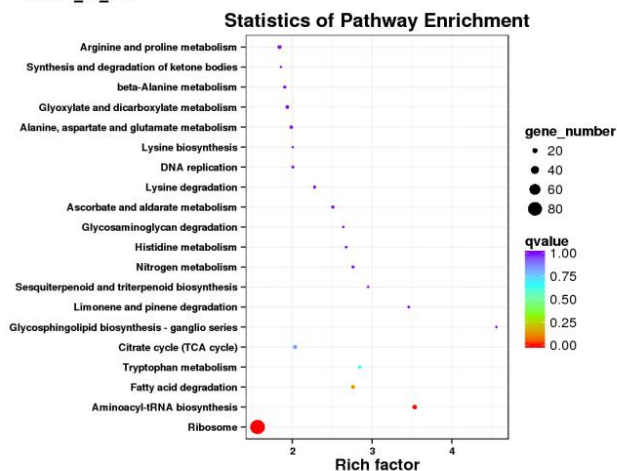

Fig. S3 KEGG enrichment of differential expressed unigenes. (A) The acid treatment vs the control, (B) The Al<sup>3+</sup> treatment vs the control; (C) The Al<sup>3+</sup> treatment vs the acid treatment.

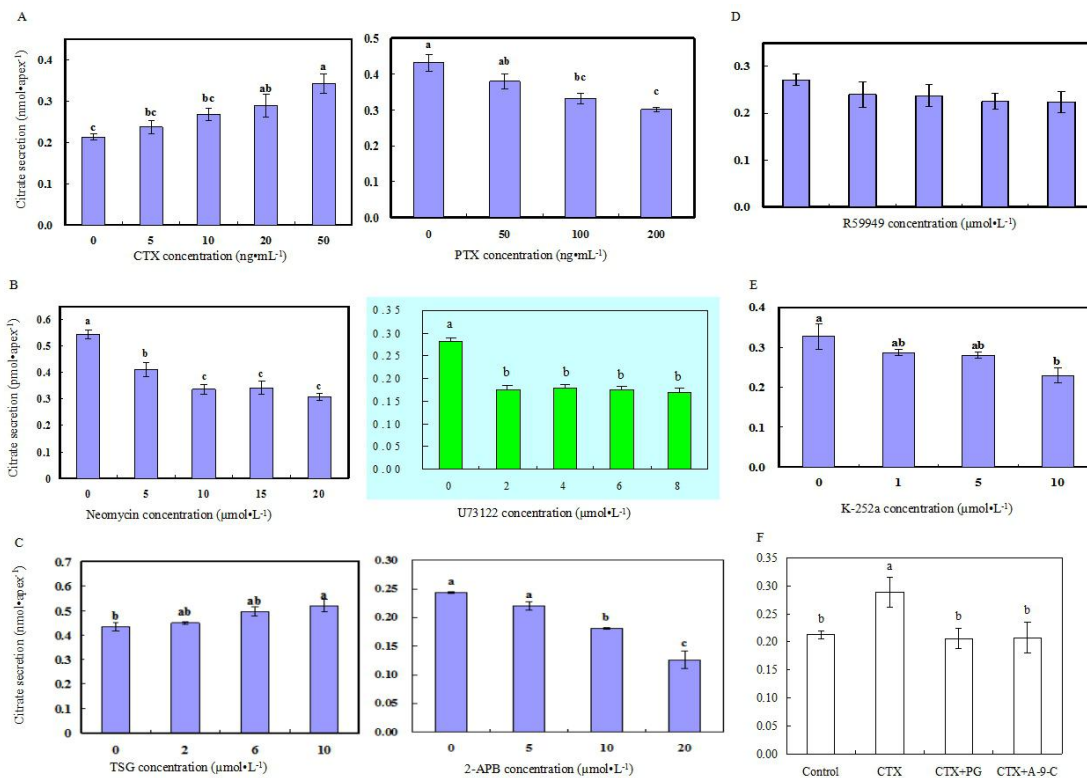

Fig. S4 Pharmacological analysis of effects of G-protein pathways on Al<sup>3+</sup>-induced secretion of citrate in R2 roots. (A), the G-protein agonist

cholera toxin (CTX) and antagonist pertussis toxin (PTX); (B), phospholipase C antagonist neomycin and U73122; (C), inositol trisphosphate receptor agonist thapsigargin (TSG) and antagonist 2-aminoethyl diphenylborinate (2-APB); (D), diacylglycerol specific inhibitor R599499; (E), protein kinase specific inhibitor K-252a; and F) anion channel inhibitors phenylglyoxal (PG) and anthracene-9-carboxylic acid (A-9-C, 30  $\mu\text{mol}\cdot\text{L}^{-1}$ ) on CTX-triggered (20  $\text{ng}\cdot\text{mL}^{-1}$ ) citrate efflux. R2 seedlings were exposed to 50  $\mu\text{mol/L}$   $\text{AlCl}_3$  for 3 h. Each value is expressed as mean  $\pm$  SEM (n = 3 replicates). Different letters above the columns indicate the significance at  $P < 0.05$ , according to Tukey's Multiple Range Test.

## 2. Supplementary Tables

**Table S1 The length distribution of assembled transcripts and unigenes**

| Length Range | Transcript      | Unigene         |
|--------------|-----------------|-----------------|
| 200-300      | 11,272 (8.61%)  | 8,844 (10.63%)  |
| 300-500      | 26,929 (20.57%) | 19,784 (23.78%) |
| 500-1000     | 42,200 (32.23%) | 29,115 (35.00%) |
| 1000-2000    | 31,047 (23.71%) | 17,259 (20.74%) |
| 2000+        | 19,485 (14.88%) | 8,195 (9.85%)   |
| Total Number | 130,933         | 83,197          |
| Total Length | 148,799,476     | 79,796,360      |
| N50 Length   | 1,664           | 1,307           |
| Mean Length  | 1,136.46        | 959.13          |

**Table S2 Summary of annotation for unigenes**

| #Anno_Database       | Annotated No. | 300 $\leq$ length < 1000 | Length $\geq$ 1000 |
|----------------------|---------------|--------------------------|--------------------|
| COG_Annotation       | 21,089        | 10,713                   | 9,196              |
| GO_Annotation        | 19,383        | 9,431                    | 8,671              |
| KEGG_Annotation      | 23,135        | 12,537                   | 9,062              |
| KOG_Annotation       | 34,594        | 17,946                   | 14,608             |
| Pfam_Annotation      | 42,822        | 21,146                   | 19,668             |
| Swissprot_Annotation | 32,597        | 15,642                   | 15,126             |
| eggNOG_Annotation    | 49,963        | 25,355                   | 21,554             |
| nr_Annotation        | 50,173        | 25,231                   | 21,774             |
| All_Annotated        | 54,976        | 28,636                   | 22,723             |

**Table S3 Top 10 GO enrichment in differential expressed unigenes**

| T01_vs_T02                                    | KS       | T02_vs_T03                                    | KS       | T02_vs_T03                                    | KS       |
|-----------------------------------------------|----------|-----------------------------------------------|----------|-----------------------------------------------|----------|
| <b>Biological process (BP)</b>                |          |                                               |          |                                               |          |
| translation                                   | 1.40E-13 | translation                                   | 2.30E-13 | translation                                   | 6.50E-14 |
| regulation of transcription,<br>DNA-templated | 5.50E-5  | regulation of transcription,<br>DNA-templated | 4.90E-05 | regulation of transcription,<br>DNA-templated | 0.00012  |
| small GTPase mediated signal<br>transduction  | 0.000140 | small GTPase mediated signal<br>transduction  | 0.00014  | small GTPase mediated signal<br>transduction  | 0.00019  |
| ornithine metabolic process                   | 0.00017  | ornithine metabolic process                   | 0.00017  | ornithine metabolic process                   | 0.0002   |

|                                       |          |                                          |          |                                             |          |
|---------------------------------------|----------|------------------------------------------|----------|---------------------------------------------|----------|
| response to karrikin                  | 0.00022  | response to karrikin                     | 0.00021  | response to karrikin                        | 0.00027  |
| plant-type cell wall modification     | 0.00053  | plant-type cell wall modification        | 0.00052  | plant-type cell wall modification           | 0.00066  |
| fatty acid biosynthetic process       | 0.0009   | fatty acid biosynthetic process          | 0.00081  | regulation of response to biotic stimulus   | 0.00113  |
| organ morphogenesis                   | 0.0011   | gravitropism                             | 0.00161  | regulation of response to external stimulus | 0.00124  |
| regulation of stomatal movement       | 0.0017   | regulation of stomatal movement          | 0.00165  | xylan metabolic process                     | 0.00131  |
| gravitropism                          | 0.00174  | organ morphogenesis                      | 0.00169  | fatty acid biosynthetic process             | 0.0015   |
| <b>Cellular component (CC)</b>        |          |                                          |          |                                             |          |
| ribosome                              | 7.00E-19 | ribosome                                 | 1.30E-18 | ribosome                                    | 8.50E-19 |
| small ribosomal subunit               | 9.30E-06 | small ribosomal subunit                  | 1.20E-05 | small ribosomal subunit                     | 1.10E-05 |
| ribonucleoprotein complex             | 0.00016  | ribonucleoprotein complex                | 0.00014  | ribonucleoprotein complex                   | 0.00026  |
| trans-Golgi network                   | 0.00057  | trans-Golgi network                      | 0.00048  | cytosolic ribosome                          | 0.0006   |
| cytosolic ribosome                    | 0.00075  | cytosolic ribosome                       | 0.00061  | trans-Golgi network                         | 0.00078  |
| cytosolic large ribosomal subunit     | 0.00452  | plant-type cell wall                     | 0.00664  | cell periphery                              | 0.00274  |
| nucleolus                             | 0.00615  | cytosolic large ribosomal subunit        | 0.0073   | nucleolus                                   | 0.00548  |
| plant-type cell wall                  | 0.00764  | nucleolus                                | 0.00795  | cytosolic large ribosomal subunit           | 0.00563  |
| cell periphery                        | 0.01382  | cell periphery                           | 0.01297  | plant-type cell wall                        | 0.01018  |
| MCM complex                           | 0.02005  | MCM complex                              | 0.01921  | organelle membrane                          | 0.01446  |
| <b>Molecular function (MF)</b>        |          |                                          |          |                                             |          |
| structural constituent of ribosome    | < 1e-30  | structural constituent of ribosome       | < 1e-30  | structural constituent of ribosome          | 3.00E-30 |
| beta-galactosidase activity           | 6.50E-06 | beta-galactosidase activity              | 6.20E-06 | beta-galactosidase activity                 | 8.90E-06 |
| phospholipase activity                | 1.90E-05 | phospholipase activity                   | 1.70E-05 | phospholipase activity                      | 2.70E-05 |
| carbohydrate binding                  | 0.0002   | carbohydrate binding                     | 0.00017  | carbohydrate binding                        | 0.00037  |
| sequence-specific DNA binding         | 0.00047  | sequence-specific DNA binding            | 0.00042  | sequence-specific DNA binding               | 0.00089  |
| transcription                         |          | transcription                            |          | transcription                               |          |
| pectinesterase activity               | 0.001    | pectinesterase activity                  | 0.00095  | pectinesterase activity                     | 0.00132  |
| transferase activity, transferring    | 0.00124  | transferase activity, transferring       | 0.00107  | histone binding                             | 0.00143  |
| hexosyl group                         |          | hexosyl group                            |          | phosphoric diester hydrolase activity       | 0.00192  |
| histone binding                       | 0.00126  | histone binding                          | 0.00123  | phosphoric diester hydrolase activity       | 0.00192  |
| phosphoric diester hydrolase activity | 0.0014   | phosphoric diester hydrolase activity    | 0.00131  | aspartyl esterase activity                  | 0.00243  |
| aspartyl esterase activity            | 0.0019   | protein serine/threonine kinase activity | 0.00167  | transition metal ion binding                | 0.00253  |

**Table S4 Al<sup>3+</sup>-induced transporter genes in R2 roots**

| Gene ID          | Description                                 | Log <sub>2</sub> (fold change) |            |            | Category   |
|------------------|---------------------------------------------|--------------------------------|------------|------------|------------|
|                  |                                             | T01_vs_T02                     | T02_vs_T03 | T01_vs_T03 |            |
| c329012.graph_c0 | ABC transporter G family member 25 (ABCG25) | N.S.                           | -3.05      | -3.90      | ABC family |
| c333559.graph_c1 | ABC transporter C family member 14 (ABCC14) | -3.21                          | N.S.       | -4.55      |            |
| c333797.graph_c0 | ABC transporter G family member 22 (ABCG22) | N.S.                           | -4.96      | -5.53      |            |
| c340676.graph_c1 | ABC transporter F family member 4 (ABCF4)   | N.S.                           | N.S.       | 2.69       |            |
| c341230.graph_c0 | ABC transporter C family member 7 (ABCC7)   | -5.57                          | N.S.       | -5.70      |            |

|                  |                                                                  |       |       |       |                                |
|------------------|------------------------------------------------------------------|-------|-------|-------|--------------------------------|
| c331542.graph_c0 | Solute carrier family 35 member G1 (SLC35G1)                     | N.S.  | 2.72  | 5.55  | MATE family                    |
| c329070.graph_c0 | MATE efflux family protein                                       | 2.86  | N.S.  | 2.98  |                                |
| c333945.graph_c0 | Sugar carrier protein C (STC)                                    | N.S.  | 2.59  | 6.15  | Major Facilitator              |
| c334178.graph_c0 | Sugar transport protein 2 (STP2)                                 | N.S.  | N.S.  | -6.11 | Superfamily                    |
| c341187.graph_c0 | Sugar transport protein 11 (STP11)                               | -4.46 | 3.18  | N.S.  |                                |
| c341366.graph_c0 | Hypothetical protein BATDEDRAFT_89188                            | N.S.  | 5.22  | 4.93  |                                |
| c338283.graph_c1 | Hypothetical protein PHYSODRAFT_523004                           | N.S.  | 3.15  | 2.89  |                                |
| c341366.graph_c0 | Hypothetical protein BATDEDRAFT_89188                            | N.S.  | 5.22  | 4.93  |                                |
| c303083.graph_c0 | Mitochondrial phosphate carrier protein 3, mitochondrial (MPCP3) | -3.27 | N.S.  | -5.98 | Inorganic ion transporter      |
| c320542.graph_c0 | Calcium-transporting ATPase 2, endoplasmic reticulum-type (ECA2) | N.S.  | N.S.  | -4.46 |                                |
| c327929.graph_c0 |                                                                  | N.S.  | N.S.  | -4.61 |                                |
| c332838.graph_c0 | Ammonium Transporter Family                                      | N.S.  | N.S.  | -3.98 |                                |
| c346112.graph_c0 | Solute carrier family 40 member 2 (S40A2)                        | N.S.  | N.S.  | 3.15  |                                |
| c341390.graph_c0 | Ferric reduction oxidase 4 (FRO4)                                | N.S.  | 4.29  | N.S.  |                                |
| c339453.graph_c0 | Pyrophosphate-energized vacuolar membrane proton pump            | N.S.  | -5.80 | -5.30 | H <sup>+</sup> -ATPase         |
| c339259.graph_c0 |                                                                  | -2.90 | -5.35 | -8.27 |                                |
| c339453.graph_c3 |                                                                  | N.S.  | N.S.  | -6.26 |                                |
| c341455.graph_c0 | Plasma membrane ATPase (Os04g0656100)                            | N.S.  | 3.08  | N.S.  |                                |
| c216702.graph_c0 | V-type proton ATPase 16 kDa proteolipid subunit                  | N.S.  | N.S.  | -5.81 |                                |
| c339055.graph_c1 | V-type proton ATPase catalytic subunit A (VPH1)                  | N.S.  | -2.83 | -5.60 |                                |
| c331477.graph_c0 | Choline transporter like family                                  | -3.73 | N.S.  | -7.28 | Plasma-membrane                |
| c333635.graph_c0 | Choline transporter-like domain-containing protein               | N.S.  | N.S.  | -3.15 | choline transporter            |
| c335074.graph_c0 | Hypothetical protein H257_00933                                  | N.S.  | -4.07 | -5.74 |                                |
| c339130.graph_c0 | Hypothetical protein PHYSODRAFT_293340                           | N.S.  | 3.05  | 3.39  |                                |
| c340447.graph_c1 | Probable folate-biopterin transporter 4 (FBT4)                   | -3.26 | N.S.  | -3.56 | BT1 family                     |
| c340819.graph_c0 | Probable folate-biopterin transporter 5 (At5g25040)              | -6.18 | N.S.  | -4.76 |                                |
| c340762.graph_c0 | Hypothetical protein, variant [Phytophthora parasitica INRA-310] | N.S.  | 4.95  | N.S.  | Lipid transport and metabolism |
| c340823.graph_c1 | Acetolactate synthase (ALS1/ STAR1)                              | N.S.  | 2.26  | 3.89  |                                |
| c302155.graph_c0 | ADP/ATP carrier protein 3, mitochondrial (AAC3)                  | -3.96 | N.S.  | -7.44 | Others                         |
| c337471.graph_c0 | Hypothetical protein F443_12489                                  | N.S.  | 3.09  | N.S.  |                                |
| c340718.graph_c0 | Hypothetical protein PHYSODRAFT_556902                           | N.S.  | 4.07  | N.S.  |                                |

N.S., not significant.

**Table S5 Expression change of genes involved in citrate metabolism**

| No. | Gene name                                                     | GeneID           | Log <sub>2</sub> (fold change) |            |            |
|-----|---------------------------------------------------------------|------------------|--------------------------------|------------|------------|
|     |                                                               |                  | T01_vs_T02                     | T02_vs_T03 | T01_vs_T03 |
| 1   | Citrate synthase (CS)                                         | c309470.graph_c0 | N.S.                           | 5.64       | 5.63       |
| 2   | Aconitate hydratase (ACO)                                     | c335652.graph_c0 | N.S.                           | N.S.       | -4.02      |
|     |                                                               | c335652.graph_c1 | -2.79                          | N.S.       | -6.32      |
|     |                                                               | c338461.graph_c0 | -2.50                          | -5.26      | -8.19      |
| 3   | Isocitrate dehydrogenase (IDH)                                | c329683.graph_c1 | -3.29                          | N.S.       | -5.45      |
| 4   | 2-oxoglutarate dehydrogenase (OGDH)                           | c328278.graph_c0 | N.S.                           | -3.42      | -6.29      |
| 5   | Succinyl-CoA synthetase (SCS)                                 | c318464.graph_c0 | -2.10                          | -5.77      | -7.89      |
|     |                                                               | c316673.graph_c0 | -2.19                          | N.S.       | -7.47      |
| 6   | Succinate dehydrogenase (SDH)                                 | c328969.graph_c0 | N.S.                           | N.S.       | -5.18      |
|     |                                                               | c329006.graph_c0 | N.S.                           | N.S.       | -5.99      |
| 7   | Phosphoenolpyruvate carboxykinase (PPCK)                      | c330658.graph_c0 | N.S.                           | -5.08      | -6.58      |
| 8   | Malate dehydrogenase, cytoplasmic (MDH)                       | c319636.graph_c0 | -3.50                          | N.S.       | -7.05      |
| 9   | Pyruvate dehydrogenase (PDH)                                  | c328301.graph_c0 | N.S.                           | N.S.       | -6.14      |
| 10  | Acetyl-coenzyme A synthetase, chloroplastic/glyoxysomal (ACS) | c341131.graph_c1 | N.S.                           | 3.32       | N.S.       |
| 11  | Fructose-bisphosphate aldolase (ALDO)                         | c323548.graph_c0 | N.S.                           | N.S.       | -4.89      |
| 12  | Glyceraldehyde-3-phosphate dehydrogenase (GAPDH)              | c318236.graph_c0 | N.S.                           | N.S.       | -5.31      |
| 13  | Triacylglycerol lipase (TGL)                                  | c313221.graph_c0 | N.S.                           | -5.35      | -5.37      |
| 14  | Acyl-CoA dehydrogenase (ACAD)                                 | c294674.graph_c0 | N.S.                           | N.S.       | -5.61      |
|     |                                                               | c309154.graph_c0 | N.S.                           | N.S.       | -5.24      |
|     |                                                               | c314698.graph_c0 | N.S.                           | N.S.       | -5.44      |
| 15  | Probable trans-2-enoyl-CoA reductase, mitochondrial (TER)     | c302431.graph_c0 | N.S.                           | N.S.       | -5.97      |
| 16  | Enoyl-CoA hydratase (ECH)                                     | c321370.graph_c0 | N.S.                           | N.S.       | -5.75      |
| 17  | 3-hydroxyacyl-CoA dehydrogenase (HAD)                         | c318974.graph_c0 | N.S.                           | N.S.       | -6.03      |
| 18  | 3-ketoacyl-CoA thiolase 2 (KAT2)                              | c319716.graph_c0 | N.S.                           | -4.26      | -4.68      |

**Table S6 Transcriptional changes of genes involved in transcription and translation under Al<sup>3+</sup> treatment**

| #ID                  | Description                                            | Log <sub>2</sub> (Fold change) |            |            |
|----------------------|--------------------------------------------------------|--------------------------------|------------|------------|
|                      |                                                        | T01_vs_T02                     | T02_vs_T03 | T01_vs_T03 |
| <b>Transcription</b> |                                                        |                                |            |            |
| c291986.graph_c3     | Protein SENSITIVE TO PROTON RHIZOTOXICITY 1(STOP1)     | N.S.                           | N.S.       | 2.91       |
| c333017.graph_c2     | Hypothetical protein SDRG_02326 (Zinc finger, ZZ type) | N.S.                           | 2.89       | N.S.       |
| c244648.graph_c0     | Transcription factor BTF3 homolog 4-like               | N.S.                           | N.S.       | -5.50      |
| c275543.graph_c0     | Transcription factor TFIIIB                            | N.S.                           | N.S.       | -4.68      |
| c297335.graph_c0     | Heat stress transcription factor A-2a                  | N.S.                           | N.S.       | -6.27      |
| c308365.graph_c0     | Transcription factor MYB57                             | -4.75                          | N.S.       | -7.16      |
| c341161.graph_c0     | Uncharacterized zinc finger protein At4g06634          | N.S.                           | N.S.       | -6.19      |

|                                                       |                                                                  |       |       |       |
|-------------------------------------------------------|------------------------------------------------------------------|-------|-------|-------|
| c323805.graph_c0                                      | Transcription factor RAX2                                        | N.S.  | N.S.  | -3.75 |
| c329116.graph_c0                                      | Transcription factor MYB98                                       | N.S.  | N.S.  | -4.42 |
| c330265.graph_c0                                      |                                                                  | N.S.  | N.S.  | -5.61 |
| c318963.graph_c0                                      | Probable elongation factor 1-gamma 2                             | -2.60 | N.S.  | -6.93 |
| c315837.graph_c0                                      | Probable mediator of RNA polymerase II transcription subunit 36b | N.S.  | N.S.  | -6.75 |
| c329304.graph_c0                                      | RuvB-like protein 1                                              | N.S.  | N.S.  | -4.14 |
| c332380.graph_c0                                      | Splicing factor U2af large subunit A                             | N.S.  | N.S.  | -5.70 |
| c336098.graph_c0                                      | Glycine-rich RNA-binding protein 2, mitochondrial                | -3.51 | N.S.  | -6.77 |
| c338944.graph_c0                                      | Intraflagellar transport protein 172                             | N.S.  | -5.20 | -7.69 |
| <b>Translation and posttranslational modification</b> |                                                                  |       |       |       |
| c247351.graph_c1                                      | 40S ribosomal protein S30 (RPS30C)                               | N.S.  | N.S.  | 3.74  |
| c332492.graph_c0                                      | Hypothetical protein EMIHUDDRAFT_362303                          | N.S.  | N.S.  | 5.99  |
| c335676.graph_c1                                      | Hypersensitive-induced response protein HIR3                     | N.S.  | 4.62  | 8.58  |
| c335919.graph_c0                                      | Aspartic proteinase A2 (APA2)                                    | N.S.  | N.S.  | 3.27  |

**Table S7 Induction of STOP1 regulated genes by Al<sup>3+</sup> in R2 roots**

| RAP ID       | Description                                                  | Gene ID          | Log <sub>2</sub> (fold change) |            |            |
|--------------|--------------------------------------------------------------|------------------|--------------------------------|------------|------------|
|              |                                                              |                  | T01_vs_T02                     | T02_vs_T03 | T01_vs_T03 |
| Os01g0860500 | Chitinase                                                    | c315389.graph_c0 | -2.71                          | N.S.       | -5.29      |
|              |                                                              | c325940.graph_c1 | N.S.                           | N.S.       | -6.01      |
| Os10g0206800 | Multidrug and toxic compound extrusion (MATE) family protein | c329070.graph_c0 | 2.86                           | N.S.       | 2.98       |
| Os09g0479900 | Subtilisin-like Ser protease SBT5.4                          | c289101.graph_c0 | -5.86                          | N.S.       | -2.99      |
| Os03g0755100 | At ALS1 homolog                                              | c332092.graph_c0 | N.S.                           | 2.45       | 2.76       |
| Os04g0494900 | Unknown function DUF642 family                               | c133280.graph_c0 | N.S.                           | N.S.       | 4.15       |

**Table S8 Transcription changes of signal transduction genes by Al<sup>3+</sup>**

| #ID              | Description                                                                      | log <sub>2</sub> (fold change) |            |            | Category                              |
|------------------|----------------------------------------------------------------------------------|--------------------------------|------------|------------|---------------------------------------|
|                  |                                                                                  | T01_vs_T02                     | T02_vs_T03 | T01_vs_T03 |                                       |
| c279616.graph_c0 | Ras-related protein RIC1                                                         | N.S.                           | N.S.       | -3.62      | Ras family and                        |
| c310836.graph_c0 | ADP-ribosylation factor 1                                                        | N.S.                           | -2.73      | -4.94      | G-protein                             |
| c323583.graph_c0 | Guanine nucleotide-binding protein subunit beta-like protein                     | -3.77                          | N.S.       | -6.83      |                                       |
| c340198.graph_c0 | G-protein beta subunit                                                           | N.S.                           | N.S.       | -4.75      |                                       |
| c291165.graph_c0 | Putative phosphatidylglycerol/phosphatidylinositol transfer protein DDB_G0282179 | N.S.                           | N.S.       | -6.11      | Diacylglycerol and inositol phosphate |
| c186435.graph_c0 | Putative cdp-diacylglycerol-inositol 3-phosphatidyltransferase                   | N.S.                           | N.S.       | -5.44      | metabolism                            |
| c334990.graph_c1 | Inositol-1,4,5-triphosphate receptor                                             | N.S.                           | N.S.       | -5.70      | Ca <sup>2+</sup> binding protein      |
| c127005.graph_c0 | Probable calcium-binding protein CML13                                           | N.S.                           | N.S.       | -5.73      |                                       |
| c135211.graph_c0 | Putative calmodulin                                                              | -2.53                          | N.S.       | -6.16      |                                       |
| c308290.graph_c0 | Caltractin                                                                       | N.S.                           | N.S.       | -5.81      |                                       |
| c327262.graph_c0 | CBL-interacting protein kinase 30                                                | N.S.                           | N.S.       | -4.23      | CBL-interacting                       |



|                  |                                                                         |       |       |       |                         |
|------------------|-------------------------------------------------------------------------|-------|-------|-------|-------------------------|
| c328302.graph_c0 | CBL-interacting serine/threonine-protein kinase 23                      | N.S.  | N.S.  | -3.27 | protein kinase          |
| c319697.graph_c0 | CBL-interacting protein kinase 28                                       | N.S.  | N.S.  | -5.36 |                         |
| c328408.graph_c0 | Probable serine/threonine-protein kinase CCRP1                          | N.S.  | N.S.  | -6.29 | Serine/threonine        |
| c330877.graph_c0 | Serine/threonine-protein kinase AtPK1/AtPK6                             | N.S.  | N.S.  | -3.95 | protein kinase          |
| c334595.graph_c1 | Probable inactive cyclic nucleotide-dependent protein kinase At2g20050  | N.S.  | N.S.  | -6.62 |                         |
| c336746.graph_c1 | Serine/threonine-protein kinase TIO                                     | N.S.  | N.S.  | -5.13 |                         |
| c305058.graph_c0 | G-type lectin S-receptor-like serine/threonine-protein kinase At1g34300 | N.S.  | N.S.  | 3.09  |                         |
| c323334.graph_c0 | Casein kinase I isoform delta-like                                      | N.S.  | N.S.  | -3.72 |                         |
| c320249.graph_c0 | SNF1-related protein kinase catalytic subunit alpha                     | N.S.  | N.S.  | -5.72 |                         |
| c336770.graph_c0 | KIN10                                                                   | N.S.  | N.S.  | -4.99 |                         |
| c128789.graph_c0 | Receptor-like protein kinase FERONIA                                    | N.S.  | N.S.  | 2.74  |                         |
| c315824.graph_c0 | Casein kinase I isoform delta-like                                      | N.S.  | N.S.  | -5.96 |                         |
| c339764.graph_c1 | Hypothetical protein F441_22463 [Phytophthora parasitica CJ01A1]        | N.S.  | N.S.  | 6.07  | Carboxylesterase family |
| c296709.graph_c0 | Probable purple acid phosphatase 20 (Precursor)                         | N.S.  | 5.31  | 4.24  |                         |
| c296709.graph_c1 |                                                                         | N.S.  | N.S.  | 4.58  |                         |
| c300233.graph_c0 | Serine/threonine-protein phosphatase PP2A catalytic subunit             | N.S.  | N.S.  | -5.86 | Phosphatase             |
| c332173.graph_c0 | Protein phosphatase 2A regulatory B subunit                             | N.S.  | N.S.  | -5.18 |                         |
| c335813.graph_c0 | Protein-tyrosine-phosphatase PTP1                                       | N.S.  | 4.60  | N.S.  |                         |
| c332173.graph_c0 | Protein phosphatase 2A regulatory B subunit                             | N.S.  | -2.40 | -4.11 |                         |
| c313664.graph_c0 | 14-3-3-like protein GF14 iota                                           | -2.81 | N.S.  | -5.05 | Others                  |
| c325152.graph_c0 | Hypothetical protein GUITHDRAFT_140475                                  | N.S.  | N.S.  | -4.68 |                         |
| c328335.graph_c1 | Cell division cycle protein 48 homolog                                  | N.S.  | -3.87 | -4.85 |                         |
| c326263.graph_c0 | Hypothetical protein PHYSODRAFT_305946                                  | N.S.  | N.S.  | -3.33 |                         |
| c332084.graph_c0 | Hypothetical protein GUITHDRAFT_118521                                  | N.S.  | N.S.  | -3.91 |                         |
| c334019.graph_c0 | Hypothetical protein, variant [Saprolegnia diclina VS20]                | N.S.  | -3.87 | -4.91 |                         |

**Table S9 Primers for qRT-PCR**

| Gene ID          | Gene description                                   | Primer sequence (5'-3')                            | Annealing (°C) | Size (bp) |
|------------------|----------------------------------------------------|----------------------------------------------------|----------------|-----------|
| c340332.graph_c0 | Phosphatidylinositol-4-phosphate 5-Kinase (PIPK5D) | F: GCTTCATCTCGAGTGTGCTG<br>R: GCCAGGCTCGTAATCAACAG | 55             | 189       |
| c336618.graph_c0 | G-protein alpha-2 subunit (GPA2)                   | F:GATGATCGGTGTGCAGTGTC<br>R:CGATGCCAAGAACGAAGAGG   | 56             | 163       |
| c344276.graph_c0 | Phosphoinositide phospholipase C (PLC)             | F:TGTTCCACCTCAAGACCTCA<br>R:TCCTTCTCCGGCCTTTTCAT   | 57             | 177       |
| c321767.graph_c0 | Diglyceride acyltransferase (DGAT)                 | F:ACACCATCAACACCAAACCG<br>R:ACCCTCGCGTGGATATTCT    | 57             | 213       |
| c291986.graph_c3 | Zinc finger protein STOP1 homolog                  | F:AGCAGCCATGGAAGTTGTTG<br>R:TCCAGGAACCGAGGATTG     | 58             | 244       |

|                  |                                              |                                                  |    |     |
|------------------|----------------------------------------------|--------------------------------------------------|----|-----|
| c341388.graph_c5 | ABC transporter C family<br>member 9 (ABCC9) | F:GCTCACCGACACTGAAGTTC<br>R:GTGCGTGCCAAGATCAGTAT | 58 | 196 |
|                  | SgEF-1a                                      | F:TGGGAGGTATTGACAAGCGT<br>R:CGGGAGCATCAATGACAGTG | 59 | 189 |

**Table S10 Up-regulation of other genes function unknown by Al<sup>3+</sup> in R2 roots**

| Gene ID          | Description                                                      | Log <sub>2</sub> (fold change) |            |            |
|------------------|------------------------------------------------------------------|--------------------------------|------------|------------|
|                  |                                                                  | T01_vs_T02                     | T02_vs_T03 | T01_vs_T03 |
| c315372.graph_c0 | PREDICTED: protein FAR1-RELATED SEQUENCE<br>5-like               | N.S.                           | 3.34       | N.S.       |
| c212720.graph_c0 | BURP domain-containing protein 3                                 | N.S.                           | N.S.       | 5.54       |
| c310871.graph_c1 | Elicitin-like protein                                            | N.S.                           | N.S.       | 7.80       |
| c128916.graph_c0 | Hypothetical protein PHAVU_009G043300g                           | N.S.                           | N.S.       | 4.13       |
| c319837.graph_c0 | Hypothetical protein PPTG_01892                                  | N.S.                           | 4.11       | 2.42       |
| c330224.graph_c0 | Hypothetical protein L915_06175                                  | N.S.                           | 8.20       | 5.31       |
| c330364.graph_c0 | Hypothetical protein PHYSODRAFT_354683                           | N.S.                           | 6.38       | N.S.       |
| c332301.graph_c0 | Hypothetical protein PHYSODRAFT_285292                           | N.S.                           | 5.44       | N.S.       |
| c332927.graph_c3 | Hypothetical protein PHYSODRAFT_527875, partial                  | N.S.                           | 5.33       | 5.32       |
| c324323.graph_c0 | Hypothetical protein L484_018823                                 | N.S.                           | 6.67       | N.S.       |
| c334725.graph_c0 | Conserved hypothetical protein [Phytophthora infestans<br>T30-4] | N.S.                           | 2.95       | N.S.       |
| c336886.graph_c0 |                                                                  | N.S.                           | 4.31       | N.S.       |
| c336855.graph_c0 | Hypothetical protein L917_16820                                  | N.S.                           | 3.14       | 4.39       |
| c336863.graph_c0 | Hypothetical protein L917_10077                                  | N.S.                           | 7.08       | 3.17       |
| c337256.graph_c0 | Hypothetical protein PPTG_13010                                  | N.S.                           | 3.50       | N.S.       |
| c337521.graph_c0 | Hypothetical protein PHYSODRAFT_284994                           | -2.59                          | 2.91       | N.S.       |
| c339954.graph_c0 | Hypothetical protein PHYSODRAFT_355861                           | N.S.                           | 2.40       | N.S.       |
| c340765.graph_c0 | Hypothetical protein L916_01294                                  | N.S.                           | 2.57       | N.S.       |
| c340796.graph_c0 | Hypothetical protein PHYSODRAFT_523306                           | N.S.                           | 3.16       | N.S.       |
| c340985.graph_c0 | Hypothetical protein F444_10199                                  | N.S.                           | 3.36       | 3.95       |
| c341362.graph_c0 | Hypothetical protein L915_03342                                  | N.S.                           | 4.85       | N.S.       |
| c344744.graph_c0 | --                                                               | N.S.                           | 3.47       | 3.60       |
| c290106.graph_c0 | --                                                               | N.S.                           | 5.53       | 5.24       |
| c129285.graph_c0 | --                                                               | N.S.                           | N.S.       | 4.52       |
| c318527.graph_c0 | --                                                               | N.S.                           | 4.82       | N.S.       |
| c311094.graph_c0 | --                                                               | N.S.                           | 4.11       | 8.40       |
